# Supplementary material for: Small Molecules Showing Significant Protection of Mice against Botulinum Neurotoxin Serotype A
Source: PubMed Central journal article supplement (PMC2854131; doi:10.1371/journal.pone.0010129), 2010-04-13
Supplement: pone.0010129.s001.pdf [file pone.0010129.s001.pdf]

```

jgpi8101-2
expl szpu1

SAMPLE
date Feb 20 2010
solvent CUC13
file /export/home/~
pang/stephen/jgpi8~
/jgpi8101-2.fid
ACQUISITION
sw 6398.0
at 3.002
np 38412
fb not used
bs 16
d1 1.000
nt 8
ct 8
TRANSMITTER
tn H1
sfrq 400.088
tof 417.3
tpwr 83
pw 7.450
DECOUPLER C13
dn 0
dof 0
dm nnn
dmm c
dpwr 46
dmf 18500

SPECIAL
temp gain not used
sp1n 20
pw90 14.900
alfa 20.000
FLAGS
n
y
n
y
nm
0.50
not used
DISPLAY
-798.3
6397.8
798.5
-19.3
-102.5
PLOT
250
0
134
3
cdc ph

```

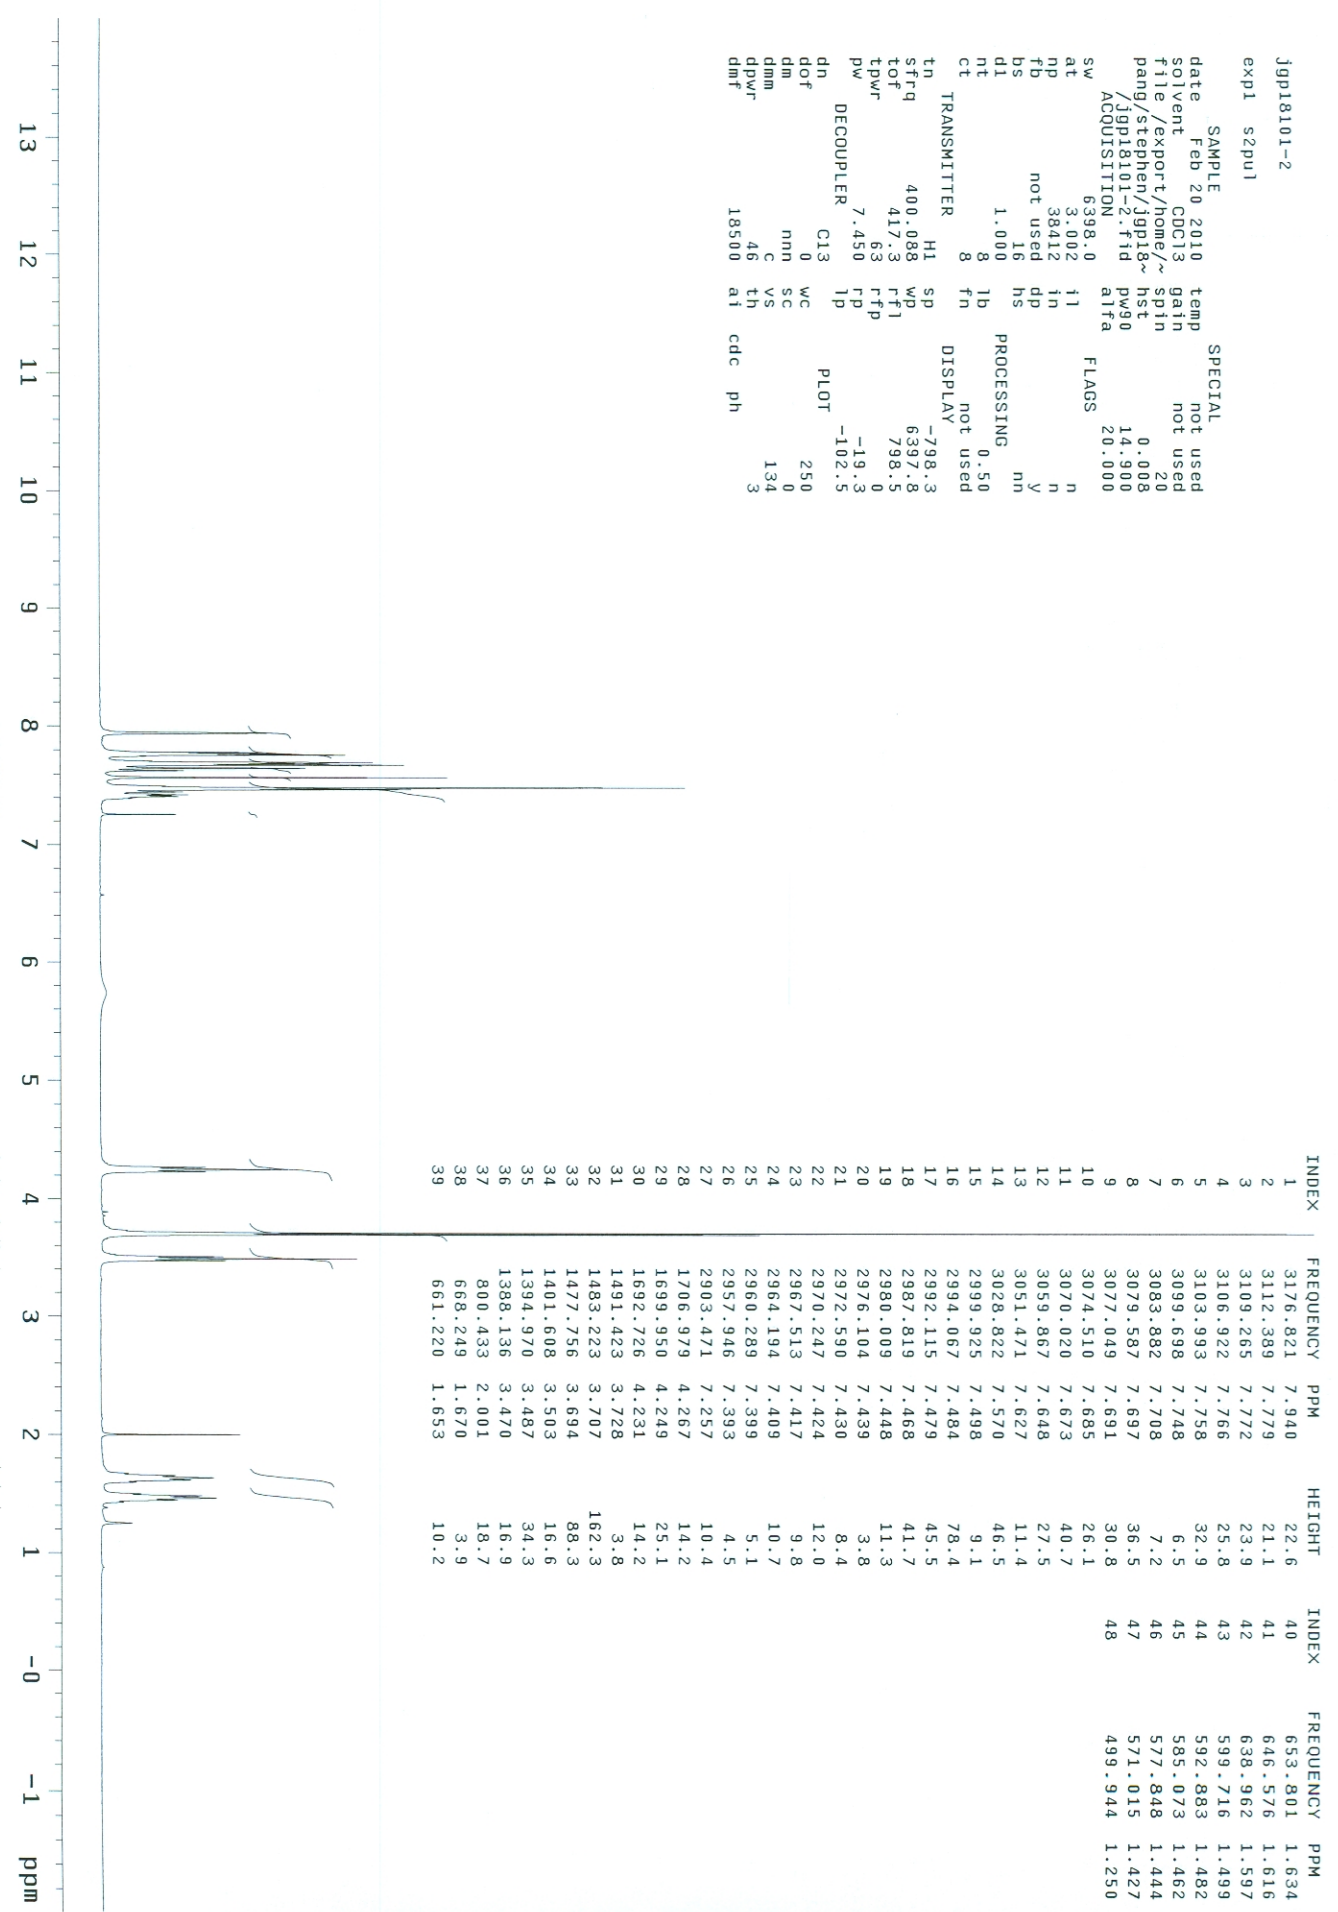

| INDEX | FREQUENCY PPM | HEIGHT | INDEX | FREQUENCY PPM |       |
|-------|---------------|--------|-------|---------------|-------|
| 1     | 3176.821      | 7.940  | 40    | 653.801       | 1.634 |
| 2     | 3112.389      | 7.779  | 41    | 646.576       | 1.616 |
| 3     | 3109.265      | 7.772  | 42    | 638.962       | 1.597 |
| 4     | 3106.922      | 7.766  | 43    | 599.716       | 1.499 |
| 5     | 3103.993      | 7.758  | 44    | 592.883       | 1.482 |
| 6     | 3099.698      | 7.748  | 45    | 585.073       | 1.462 |
| 7     | 3083.882      | 7.708  | 46    | 577.848       | 1.444 |
| 8     | 3079.587      | 7.697  | 47    | 571.015       | 1.427 |
| 9     | 3077.049      | 7.691  | 48    | 499.944       | 1.250 |
| 10    | 3074.510      | 7.685  |       |               |       |
| 11    | 3070.020      | 7.673  |       |               |       |
| 12    | 3059.867      | 7.648  |       |               |       |
| 13    | 3051.471      | 7.627  |       |               |       |
| 14    | 3028.822      | 7.570  |       |               |       |
| 15    | 2999.925      | 7.498  |       |               |       |
| 16    | 2994.067      | 7.484  |       |               |       |
| 17    | 2992.115      | 7.479  |       |               |       |
| 18    | 2987.819      | 7.468  |       |               |       |
| 19    | 2980.009      | 7.448  |       |               |       |
| 20    | 2976.104      | 7.439  |       |               |       |
| 21    | 2972.590      | 7.430  |       |               |       |
| 22    | 2970.247      | 7.424  |       |               |       |
| 23    | 2967.513      | 7.417  |       |               |       |
| 24    | 2964.194      | 7.409  |       |               |       |
| 25    | 2960.289      | 7.399  |       |               |       |
| 26    | 2957.946      | 7.393  |       |               |       |
| 27    | 2903.471      | 7.257  |       |               |       |
| 28    | 1706.979      | 4.267  |       |               |       |
| 29    | 1699.950      | 4.249  |       |               |       |
| 30    | 1692.726      | 4.231  |       |               |       |
| 31    | 1491.423      | 3.728  |       |               |       |
| 32    | 1483.223      | 3.707  |       |               |       |
| 33    | 1477.756      | 3.694  |       |               |       |
| 34    | 1401.608      | 3.503  |       |               |       |
| 35    | 1394.970      | 3.487  |       |               |       |
| 36    | 1388.136      | 3.470  |       |               |       |
| 37    | 800.433       | 2.001  |       |               |       |
| 38    | 668.249       | 1.670  |       |               |       |
| 39    | 661.220       | 1.653  |       |               |       |

1.02317209.21  
2.1010375

2.00 4.78 2.01

2.04 2.03
