# Supplementary material for: Small Molecules Showing Significant Protection of Mice against Botulinum Neurotoxin Serotype A
Source: PubMed Central journal article supplement (PMC2854131; doi:10.1371/journal.pone.0010129), 2010-04-13

# F4H before HPLC

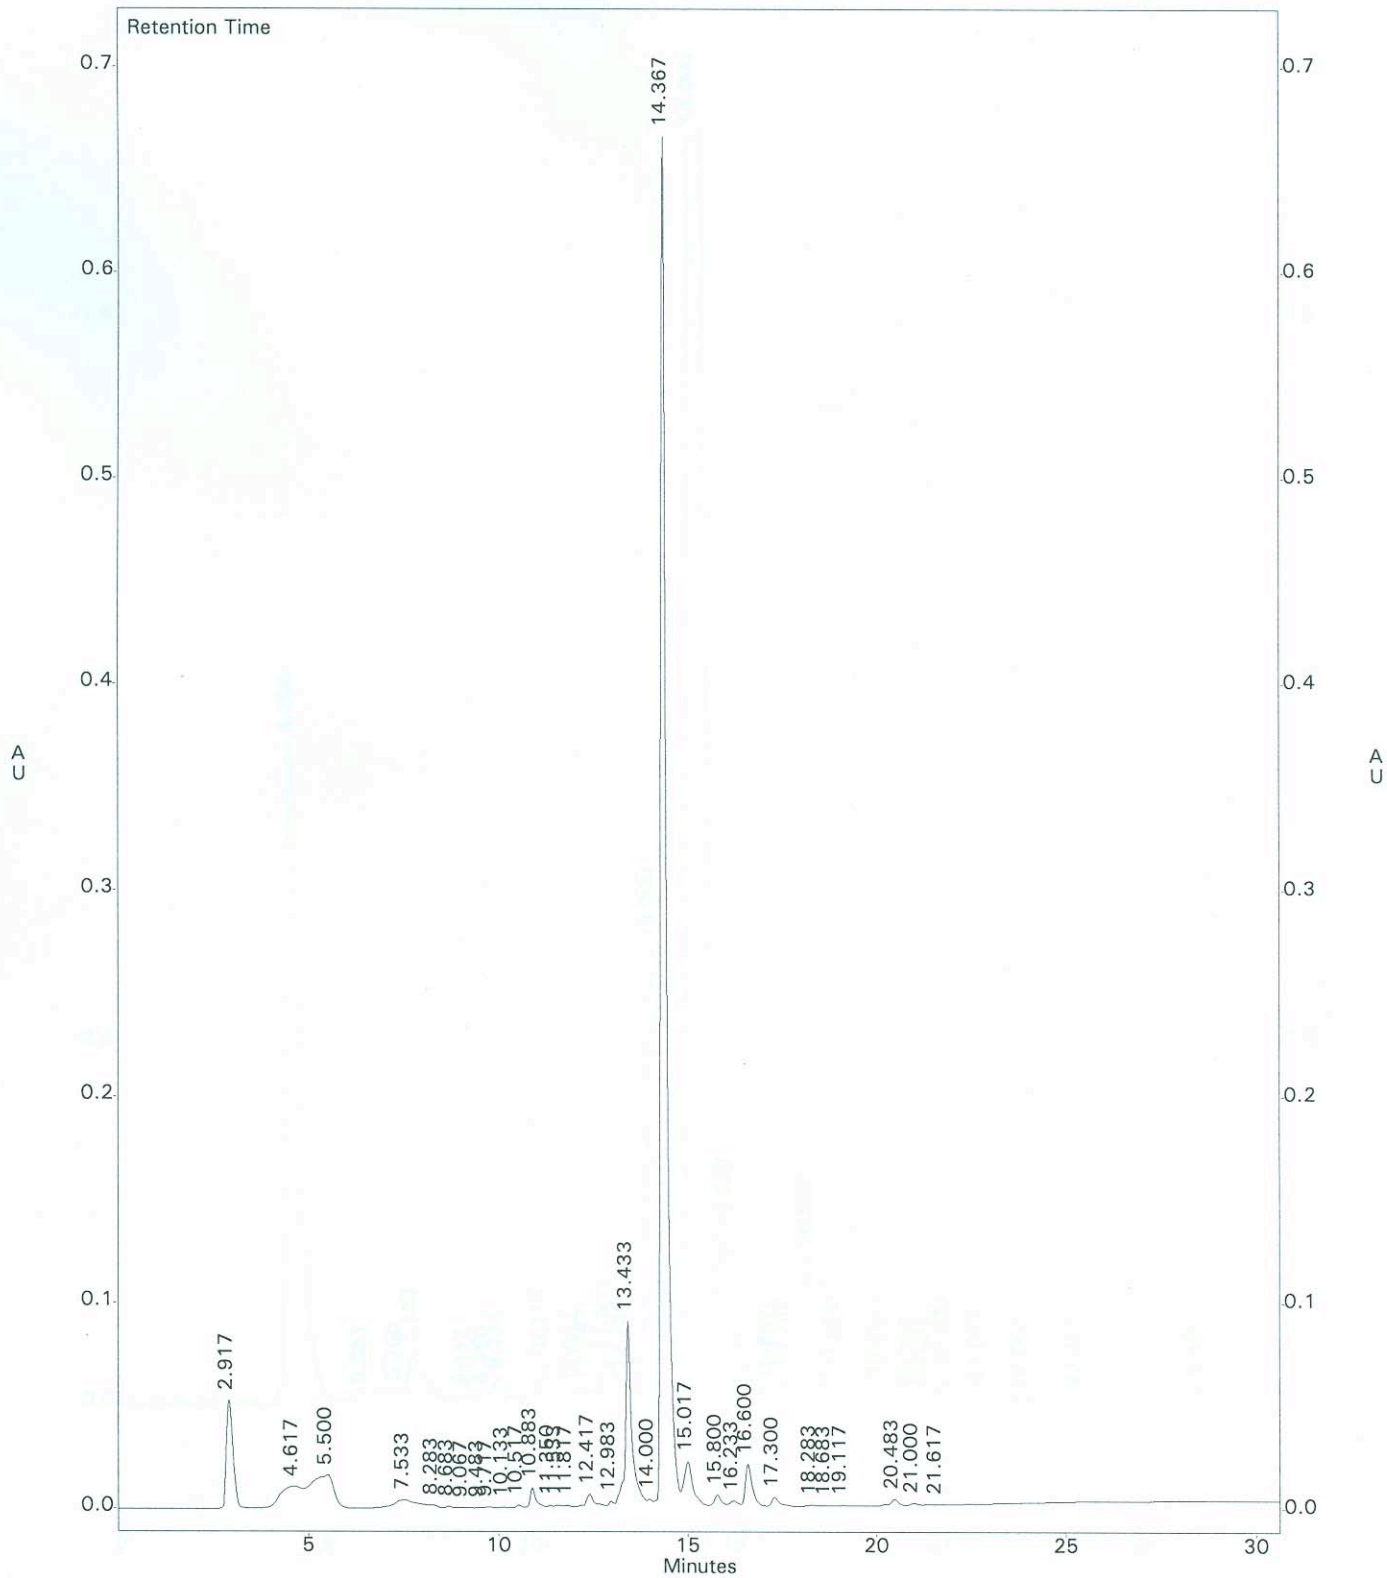

# F4H after HPLC

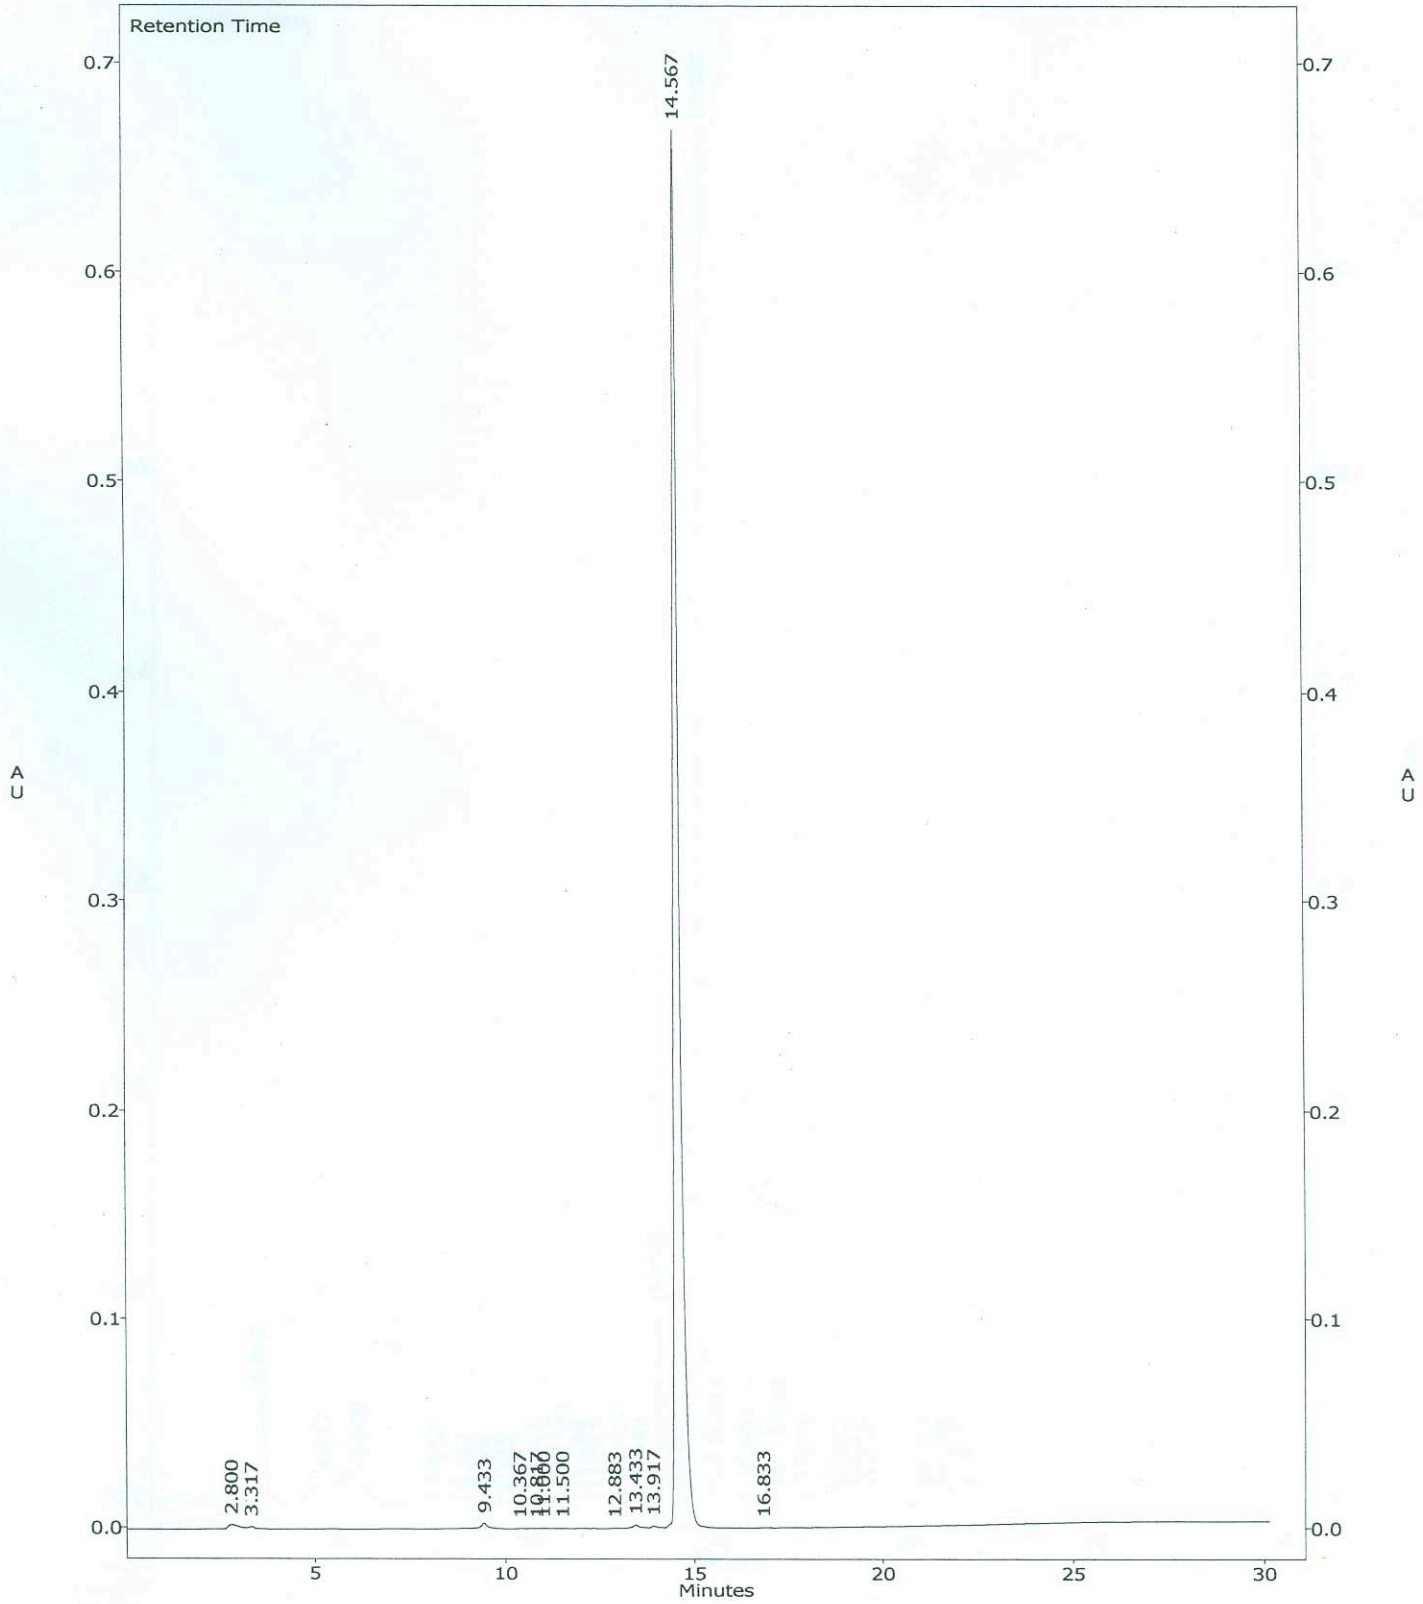

Supplement: pone.0010129.s003.pdf [file pone.0010129.s003.pdf]
