# Supplementary material for: Small Molecules Showing Significant Protection of Mice against Botulinum Neurotoxin Serotype A
Source: PubMed Central journal article supplement (PMC2854131; doi:10.1371/journal.pone.0010129), 2010-04-13
Supplement: pone.0010129.s005.pdf [file pone.0010129.s005.pdf]

9  
8  
7  
6  
5  
4  
3  
2  
1  
ppm

0.95 4.95 1.99 5.12 7.71 0.92 0.90 0.88

2.00 3.11 2.19 2.13

3.52 7.9 7.66

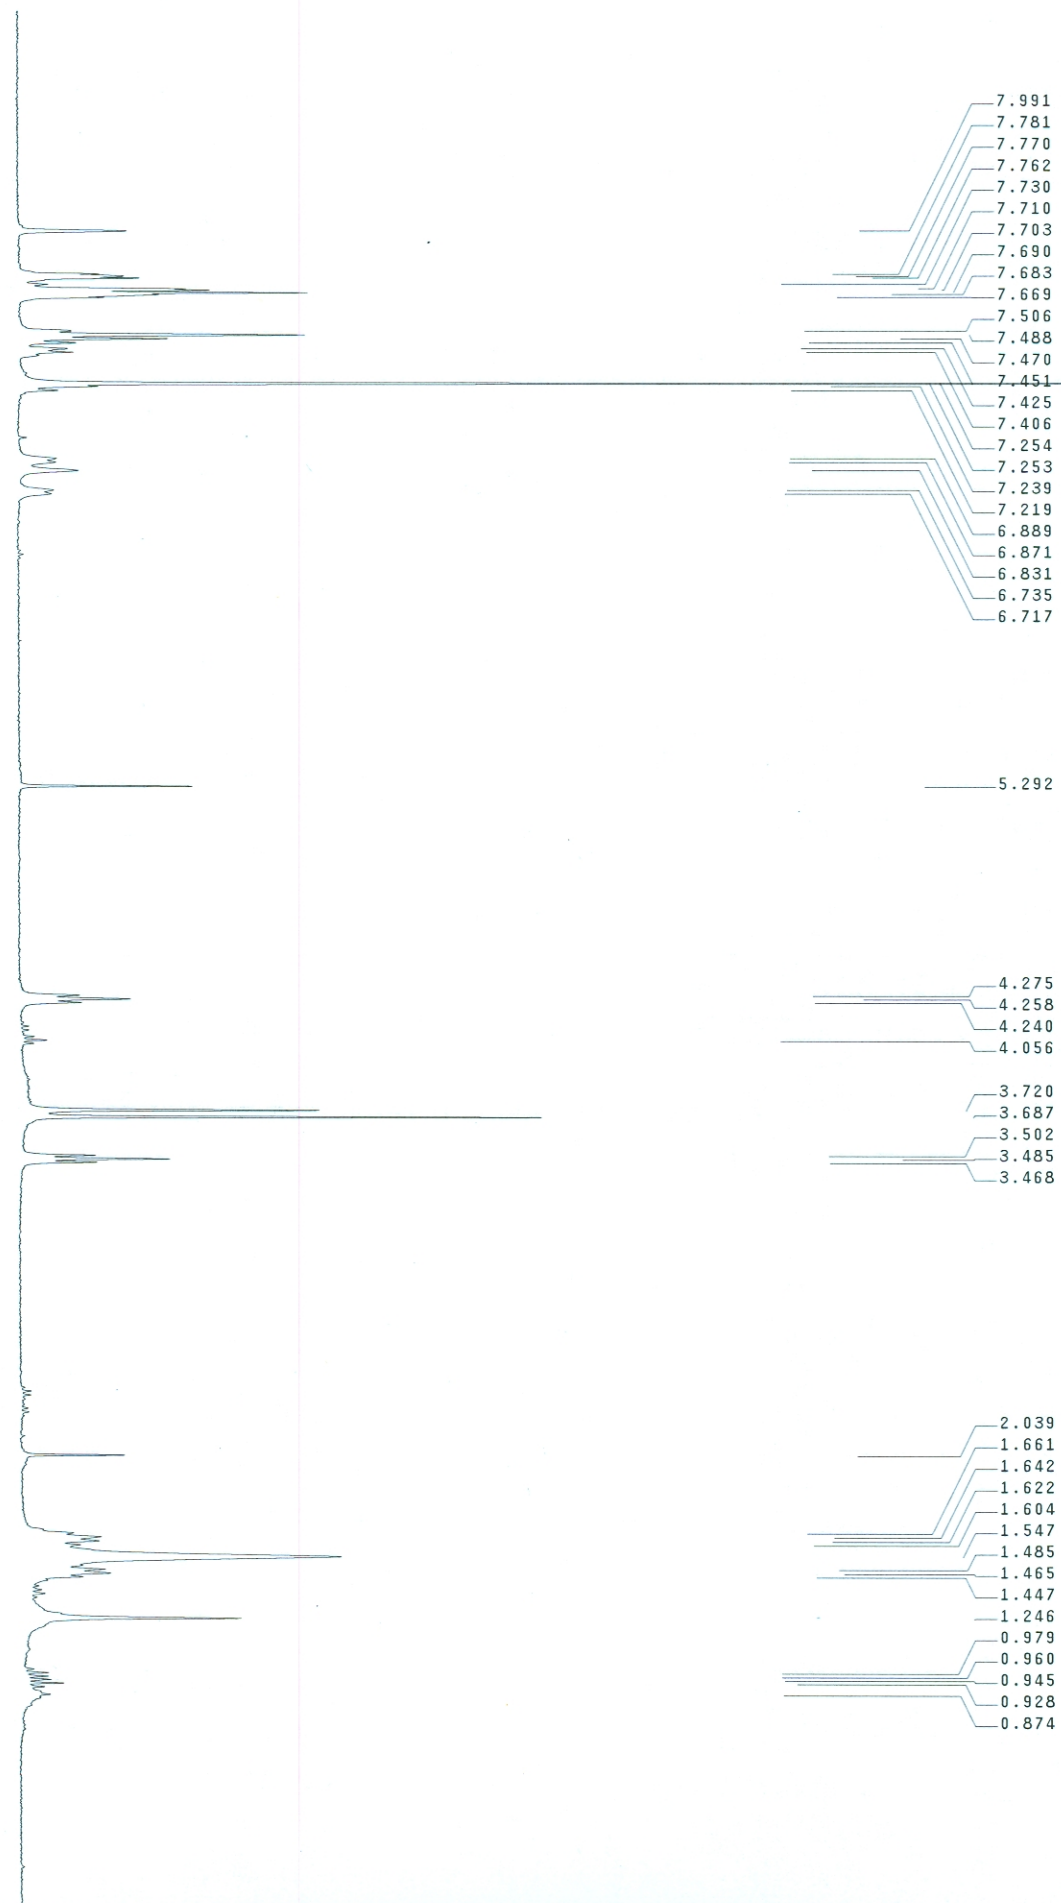

- 7.991
- 7.781
- 7.770
- 7.762
- 7.730
- 7.710
- 7.703
- 7.690
- 7.683
- 7.669
- 7.506
- 7.488
- 7.470
- 7.451
- 7.425
- 7.406
- 7.254
- 7.253
- 7.239
- 7.219
- 6.889
- 6.871
- 6.831
- 6.735
- 6.717
- 5.292
- 4.275
- 4.258
- 4.240
- 4.056
- 3.720
- 3.687
- 3.502
- 3.485
- 3.468
- 2.039
- 1.661
- 1.642
- 1.622
- 1.604
- 1.547
- 1.485
- 1.465
- 1.447
- 1.246
- 0.979
- 0.960
- 0.945
- 0.928
- 0.874
