# Supplementary material for: Small Molecules Showing Significant Protection of Mice against Botulinum Neurotoxin Serotype A
Source: PubMed Central journal article supplement (PMC2854131; doi:10.1371/journal.pone.0010129), 2010-04-13

# F3A before HPLC

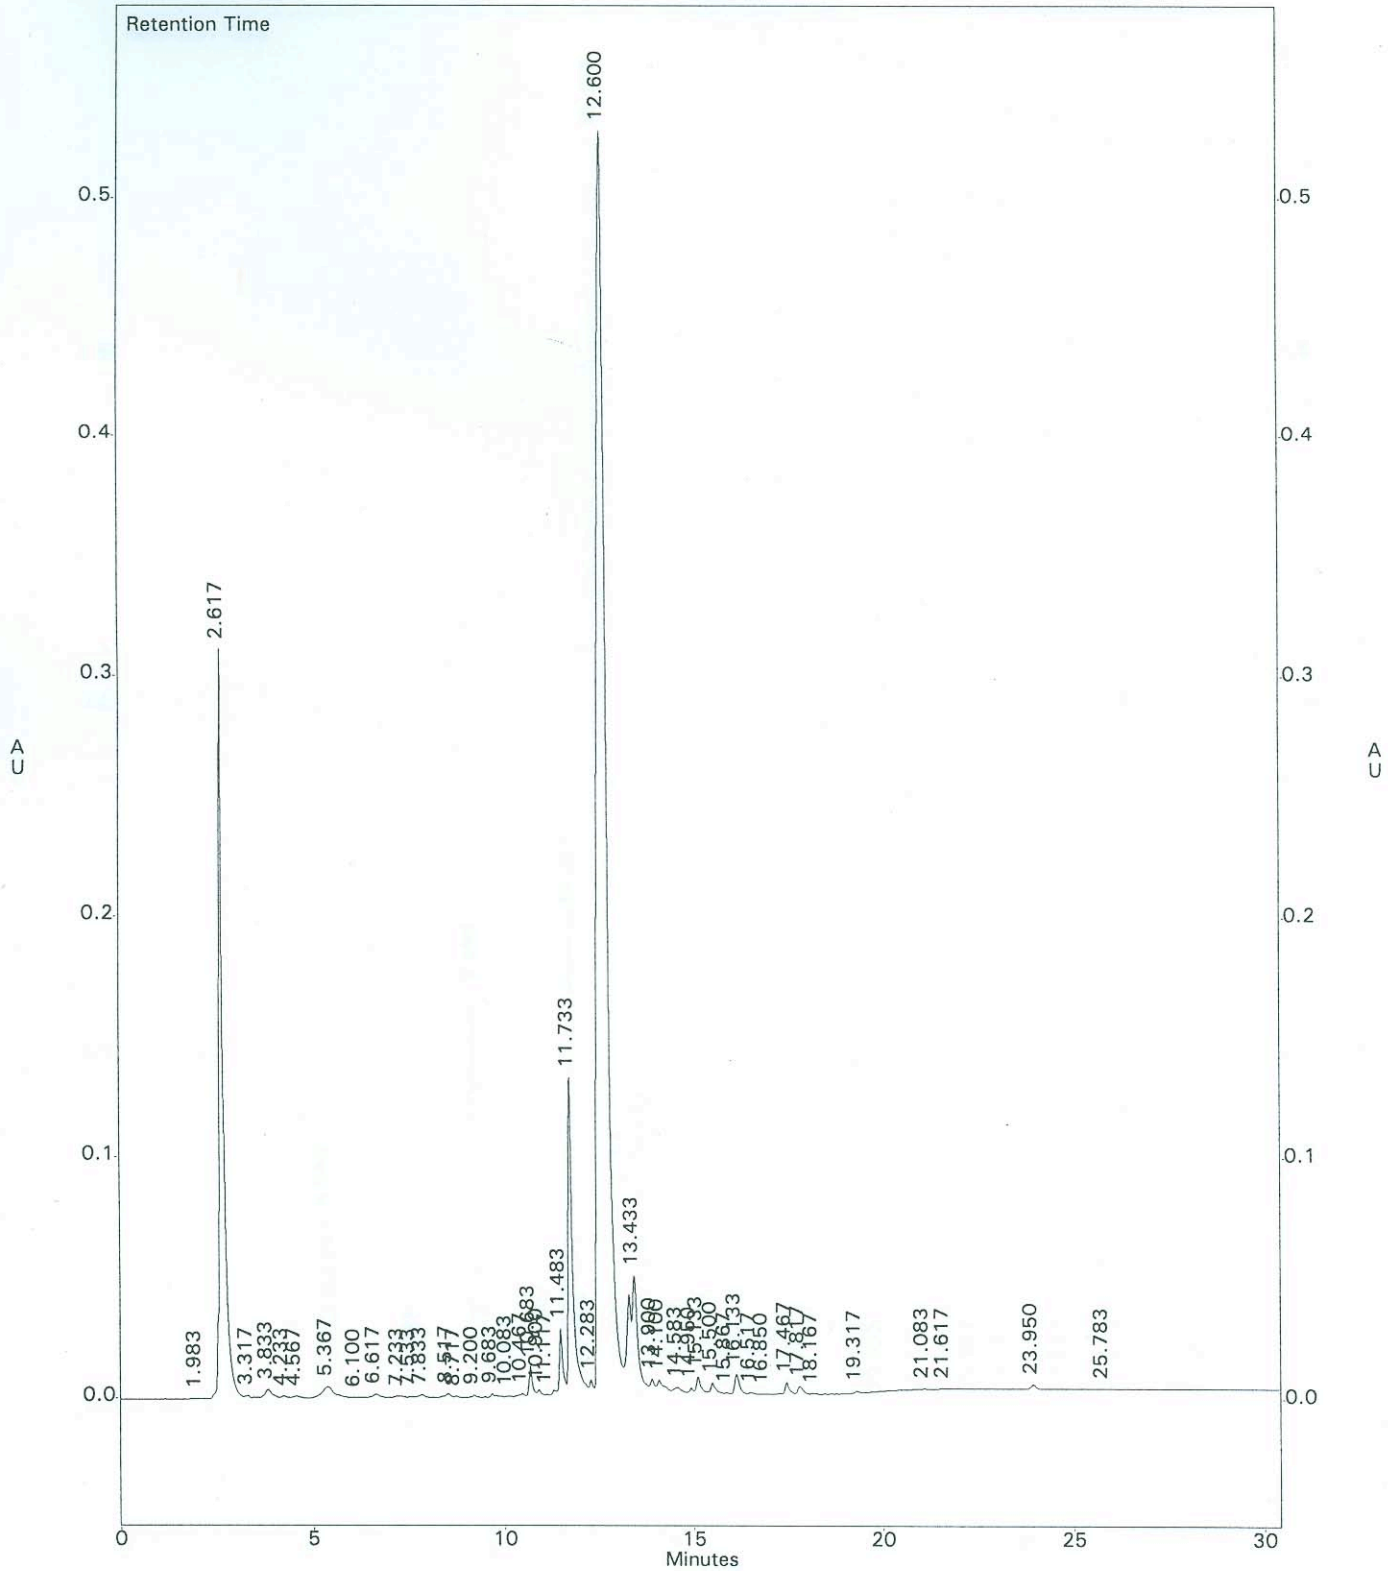

# F3A after HPLC

Retention Time

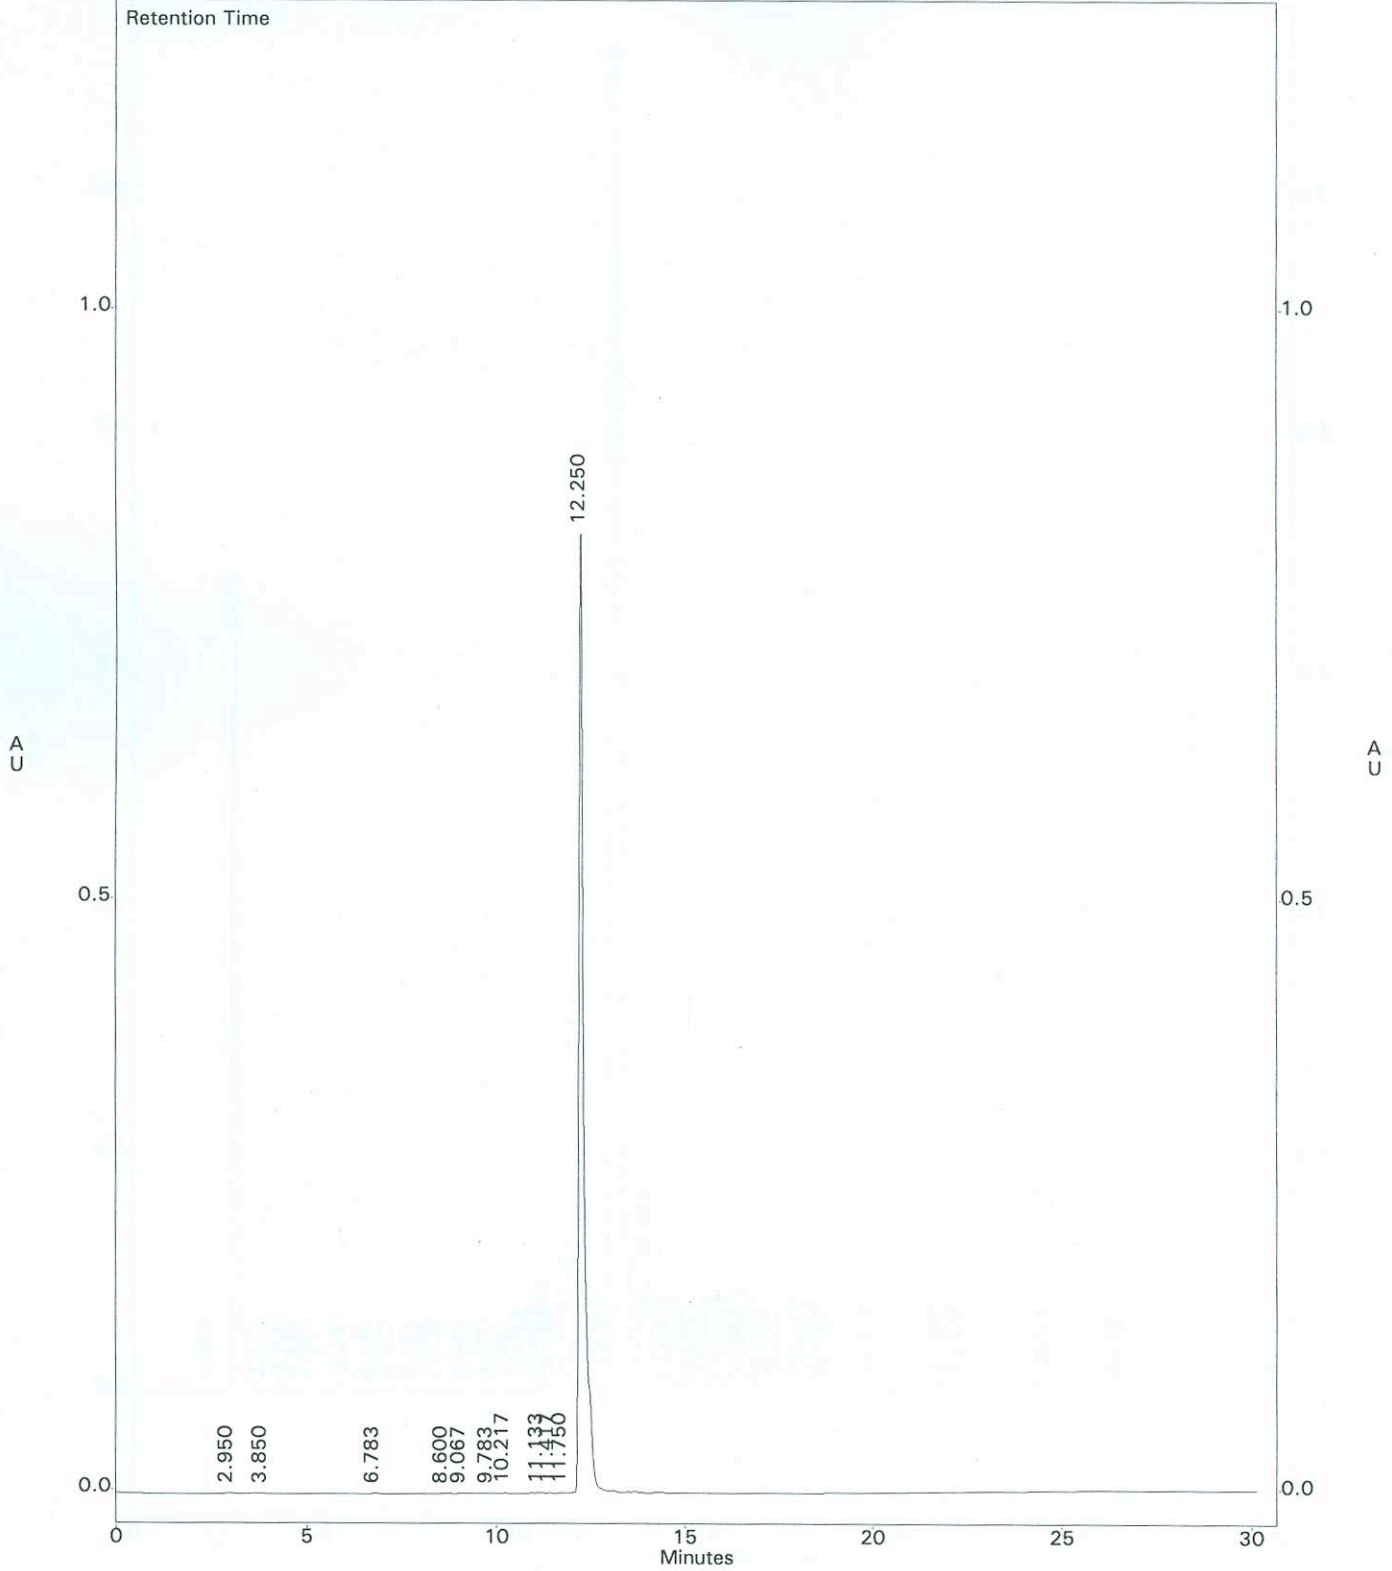

Supplement: pone.0010129.s006.pdf [file pone.0010129.s006.pdf]
